# Supplementary material for: Reunderstanding the photoinduced charge transfer process of ammonium polyoxomolybdate
Source: Royal Society of Chemistry journal article supplement (doi:10.1039/c9dt02106j), 2019-01-01
Supplement: c9dt02106j1.pdf [file c9dt02106j1.pdf]

## Electronic Supplementary Information

### Re-understanding photoinduced charge transfer process of ammonium polyoxomolybdate

Li Li, Yang Hua, Xiao-Nan Li, Yu Guo, and Hong Zhang\*

Institute of Polyoxometalate Chemistry, Department of Chemistry, Northeast Normal University, Changchun, Jilin 130024, PR China.

Fax: +86-0431-85098827; Tel: +86-0431-85099372; E-mail: hope20130122@163.com

#### Table of contents

**Fig. S1**  $^1\text{H}$  NMR of 4-phenylpyridine hydrochloride (4PPHCl) in DMSO.

**Fig. S2**  $^1\text{H}$  NMR of 4-phenylpyridine (4PP) in DMSO.

**Fig. S3** FT-IR spectra of 4-phenylpyridine (left) and 4-phenylpyridine hydrochloride (right). Labels: **4PP**: 4-phenylpyridine; **4PPH·xH<sub>2</sub>O**: aqueous 4-phenylpyridine hydrochloride; **4PPH**: anhydrous 4-phenylpyridine hydrochloride.

**Fig. S4** IR patterns of **1** (left) and **2** (right). Labels: **1a** and **2a**: before irradiation, **2b-P**: after irradiation.

**Fig. S5** H-bonds around the trimesic acid and pyromellitic acid in compounds **1** (a) and **2** (b), respectively. All distances for H bonds are labelled in angstrom.

**Fig. S6** (a)  $\pi\cdots\pi$  stacking interactions in compound **1**; (2)  $p\cdots\pi$  stacking interactions around benzene, pyridine rings and O atoms from pyromellitic acid in compound **2**. All distances for H bonds are labelled in angstrom. Color scheme: carbon, grey-50%; nitrogen, blue; oxygen, red; hydrogen, grey-25%.

**Fig. S7** UV-Vis absorption spectra of **3** in the photochromic process. Labels: **3a**: before photo irradiation; **3b-P**: after exposure in a 300 W Xe lamp; **decolored**: heating in 120 °C for 2 h; **3b-P'**: the decolored samples exposed to the same Xe lamp again.

**Fig. S8** Photochromism of compound **3** at room temperature in  $\text{N}_2$ . The balloon is filled with nitrogen.

**Fig. S9** UV-Vis absorption spectra of **3**. Labels: **3a**: before photo irradiation; **3b-P**: Photochromism of compound **3** at room temperature in  $\text{N}_2$ .

**Fig. S10** C 1s XPS ( $\text{Al-K}\alpha$ ) core-level spectra of compound **3** before and after photo irradiation in a vacuum. Labels: **3a**, before irradiation; **3b-P**, after photo irradiation; BE: Binding Energy.

**Fig. S11** The core-level spectra of N 1s XPS ( $\text{Al-K}\alpha$ ) (a), O 1s XPS ( $\text{Al-K}\alpha$ ) (b), Mo 3d XPS ( $\text{Al-K}\alpha$ ) before photo irradiation (c), Mo 3d XPS ( $\text{Al-K}\alpha$ ) after photo irradiation (d) for compound **3** in a vacuum. Labels: **3a** before irradiation; **3b-P** after photo irradiation; BE: Binding Energy.

**Fig. S12** Electrostatic potential (ESP) surfaces of the neutral coordination molecule in **3** before irradiation. Significant surface local minima and maxima are represented as orange and cyan spheres, respectively.

**Fig. S13** FT-IR spectra of **3**. Labels: **3a**, before irradiation; **3b-P**, after photo irradiation; **decolored**, heating in 120 °C for 2 h.

**Fig. S14** PXRD patterns of **3**. Labels: **3a**: before irradiation; **3b-P**: after photo irradiation; **decolored**: heating in 120 °C for 2 h; **simulated**: simulated patterns from single-crystal X-ray structure data.

**Fig. S15**  $^1\text{H}$  NMR of compound **3** before and after photo irradiation in DMSO.

**Fig. S16** PXRD patterns of **1** and **2**. Labels: **1a**, **2a**: before irradiation; **simulated**: simulated patterns from single-crystal X-ray structure data.

**Fig. S17** TGA curve of aqueous 4-phenylpyridine hydrochloride (**4PPHCl**· $x\text{H}_2\text{O}$ ) (a), compound **1** (b), **2** (c) and **3** (d) were investigated using powder samples under  $\text{N}_2$ .

**Fig. S18** Molecular structures of compound **3**. All distances for H bonds are labelled in angstrom.

**Fig. S19** The infrared theoretical calculation of protonated 4-phenylpyridine (**4PPH**) before and after accept one electron using the Gaussian 09 package was carried out at the B3LYP/6-31+G(d,p) level.

**Table S1** Crystal Data and Structure Refinements for **1**, **2** and **3**.

**Table S2** Selected bond lengths (Å) for **1**, **2** and **3**.

**Table S3** Selected angles (deg) for **1**, **2** and **3**.

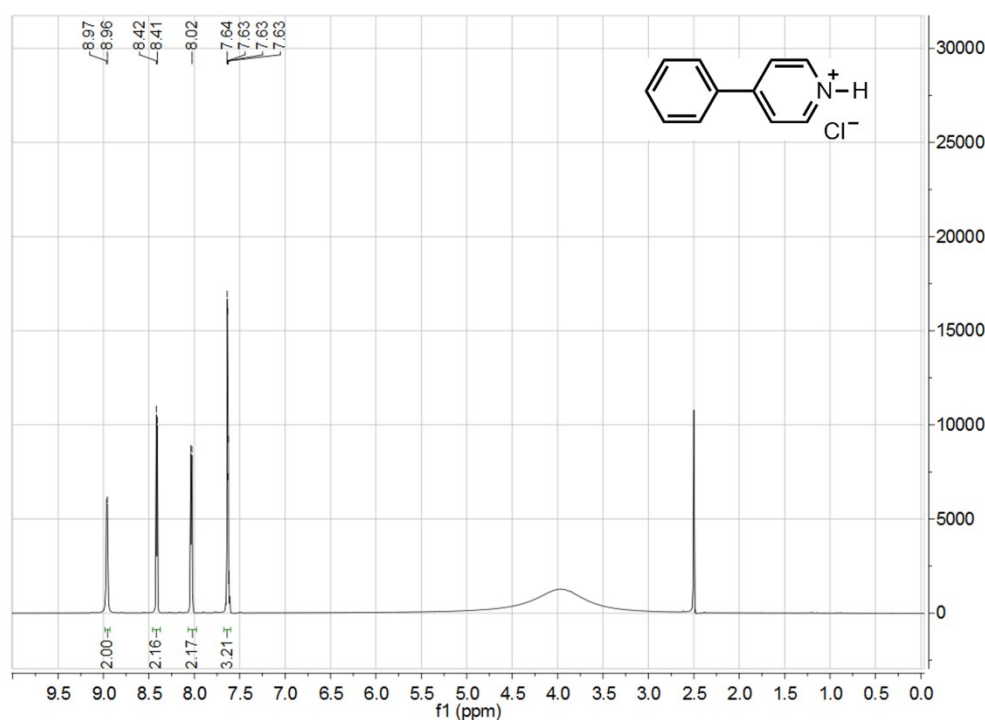

**Fig. S1**  $^1\text{H}$  NMR of 4-phenylpyridine hydrochloride (**4PPHCl**) in DMSO.

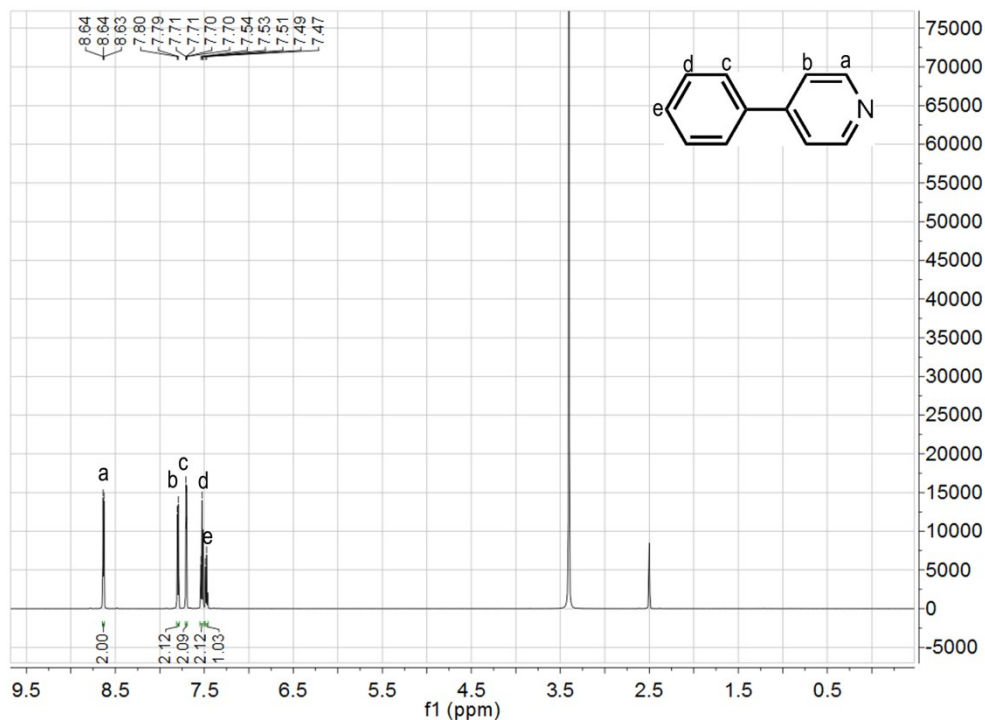

**Fig. S2**  $^1\text{H}$  NMR of 4-phenylpyridine (4PP) in DMSO.

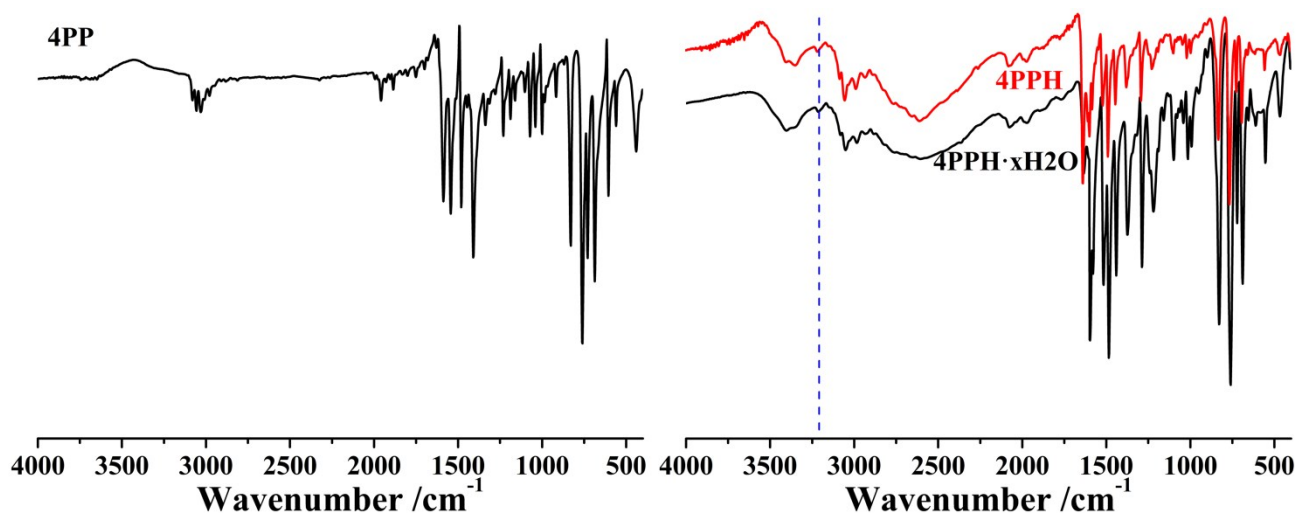

**Fig. S3** FT-IR spectra of 4-phenylpyridine (left) and 4-phenylpyridine hydrochloride (right). Labels: **4PP**: 4-phenylpyridine; **4PPH·xH<sub>2</sub>O**: aqueous 4-phenylpyridine hydrochloride; **4PPH**: anhydrous 4-phenylpyridine hydrochloride.

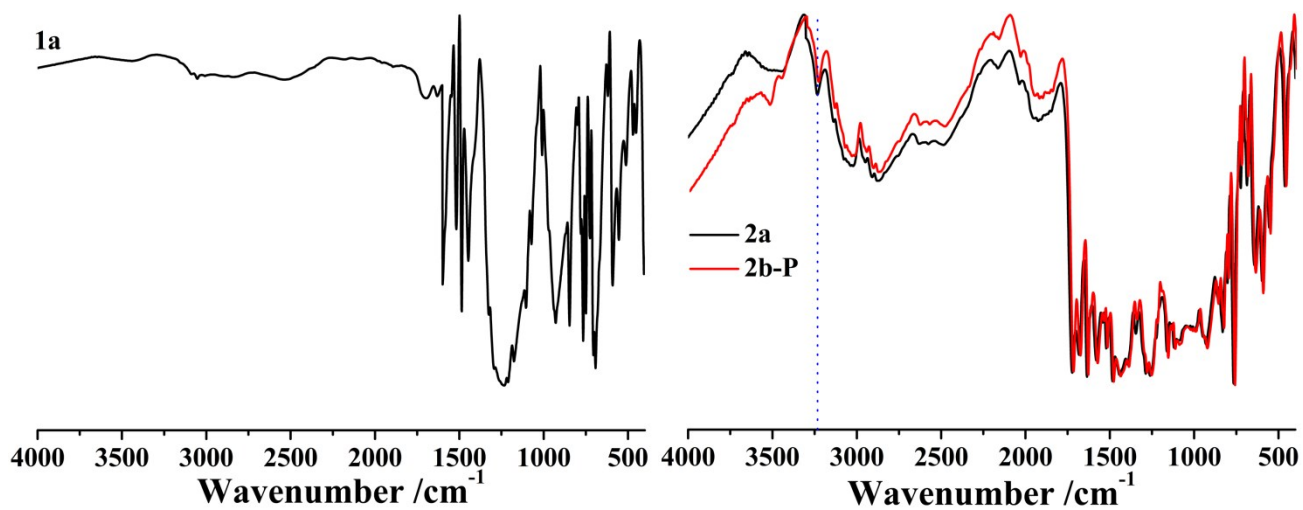

Fig. S4 IR patterns of 1 (left) and 2 (right). Labels: 1a and 2a: before irradiation, 2b-P: after irradiation.

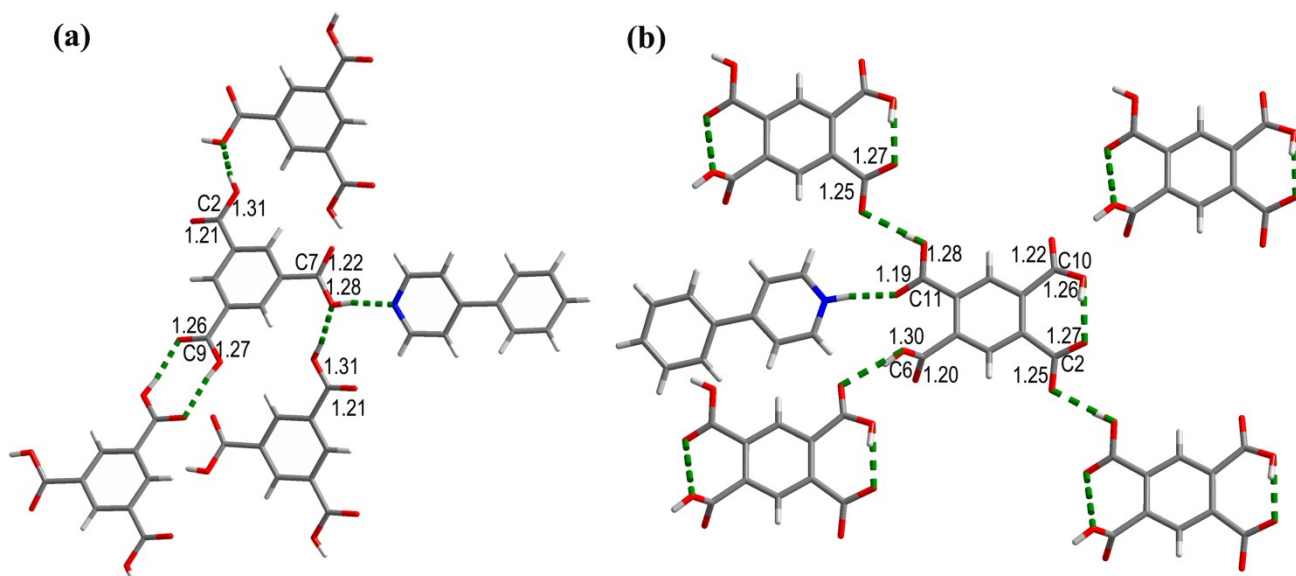

Fig. S5 H-bonds around the trimesic acid and pyromellitic acid in compounds 1 (a) and 2 (b), respectively. All distances for H bonds are labelled in angstrom.

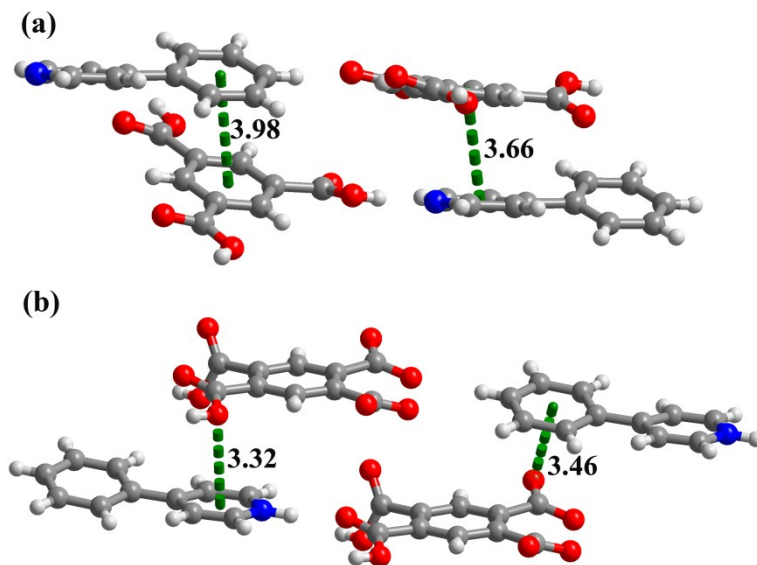

**Fig. S6** (a)  $\pi\cdots\pi$  stacking interactions in compound **1**; (2)  $p\cdots\pi$  stacking interactions around benzene, pyridine rings and O atoms from pyromellitic acid in compound **2**. All distances for H bonds are labelled in angstrom. Color scheme: carbon, grey-50%; nitrogen, blue; oxygen, red; hydrogen, grey-25%.

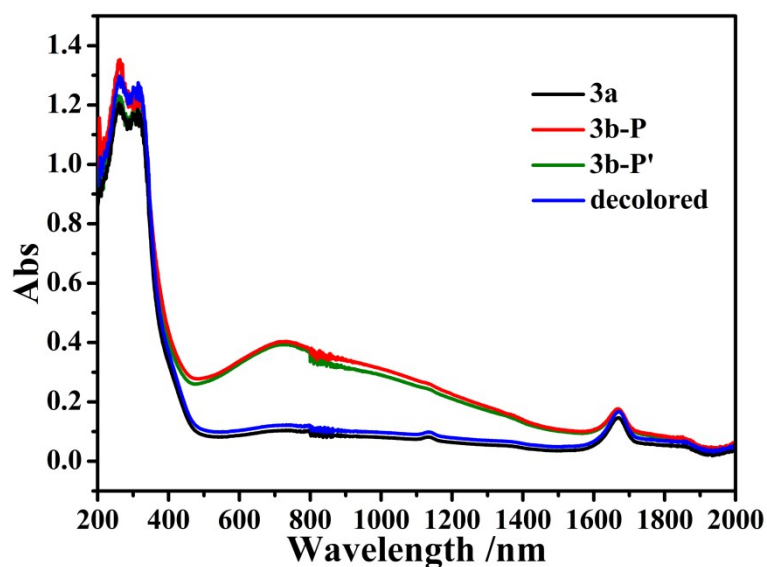

**Fig. S7** UV-Vis absorption spectra of **3** in the photochromic process. Labels: **3a**: before photo irradiation; **3b-P**: after exposure in a 300 W Xe lamp; **decolored**: heating in 120 °C for 2 h; **3b-P'**: the decolored samples exposed to the same Xe lamp again.

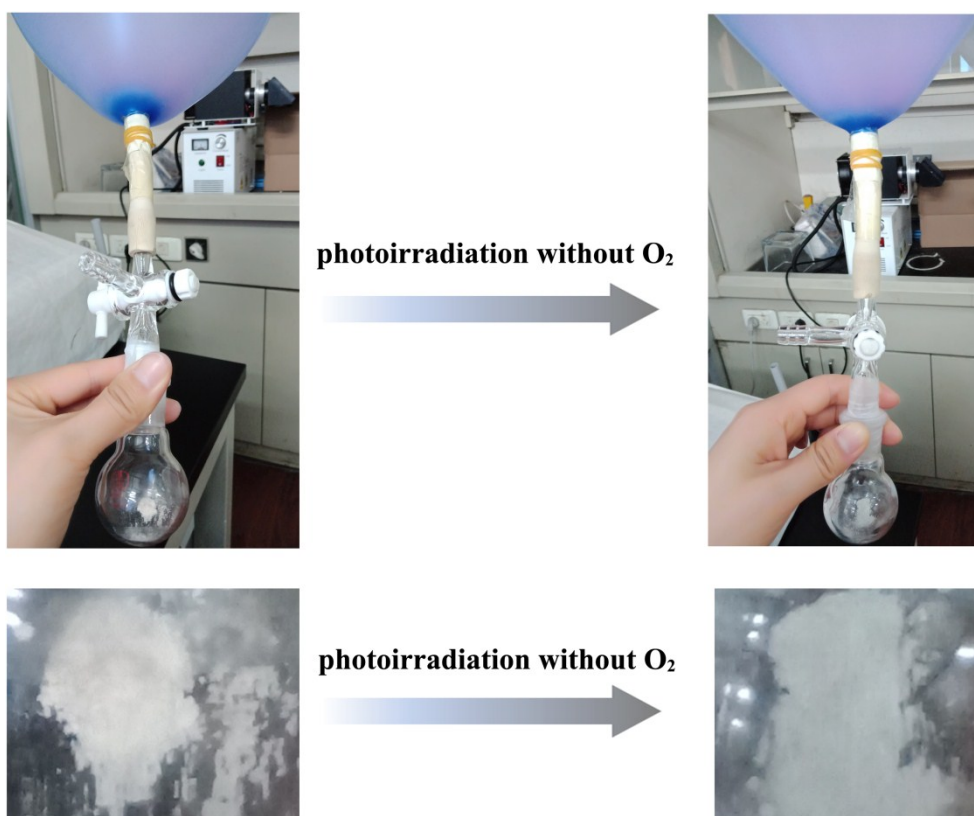

**Fig. S8** Photochromism of compound **3** at room temperature in N<sub>2</sub>. The balloon is filled with nitrogen.

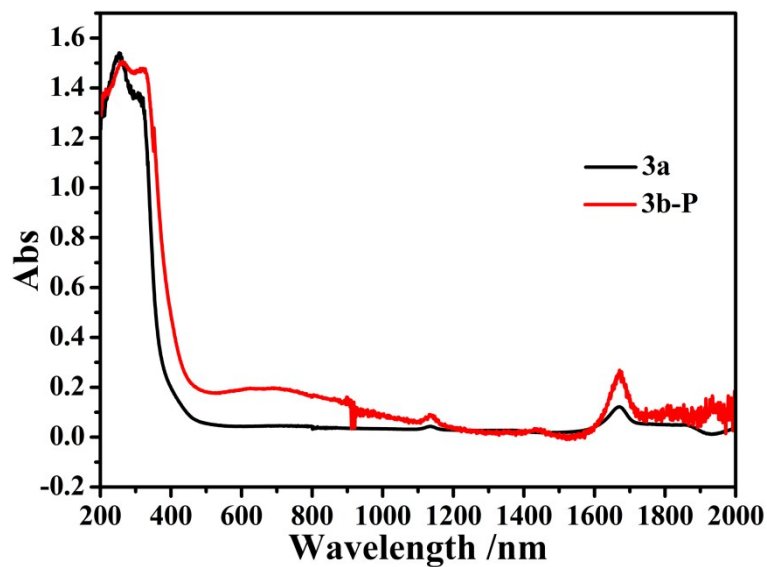

**Fig. S9** UV-Vis absorption spectra of **3**. Labels: **3a**: before photo irradiation; **3b-P**: Photochromism of compound **3** at room temperature in  $N_2$ .

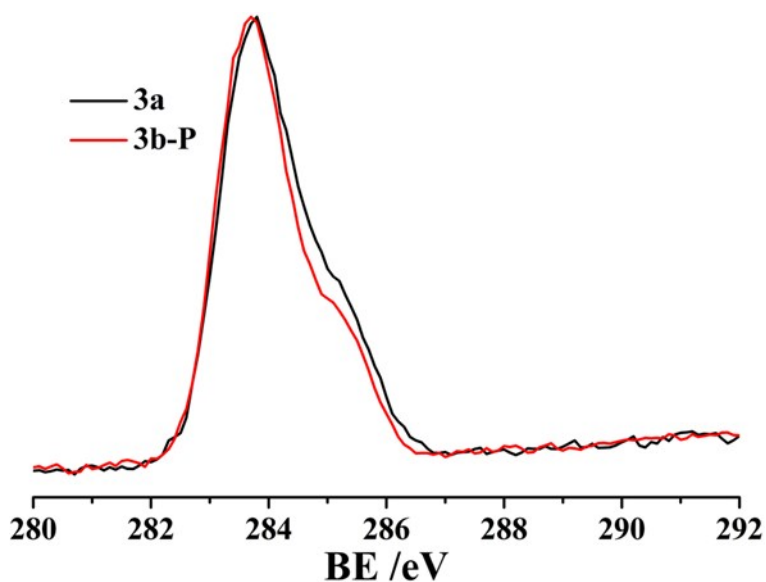

**Fig. S10** C 1s XPS ( $Al-K\alpha$ ) core-level spectra of compound **3** before and after photo irradiation in a vacuum. Labels: **3a**, before irradiation; **3b-P**, after photo irradiation; BE: Binding Energy.

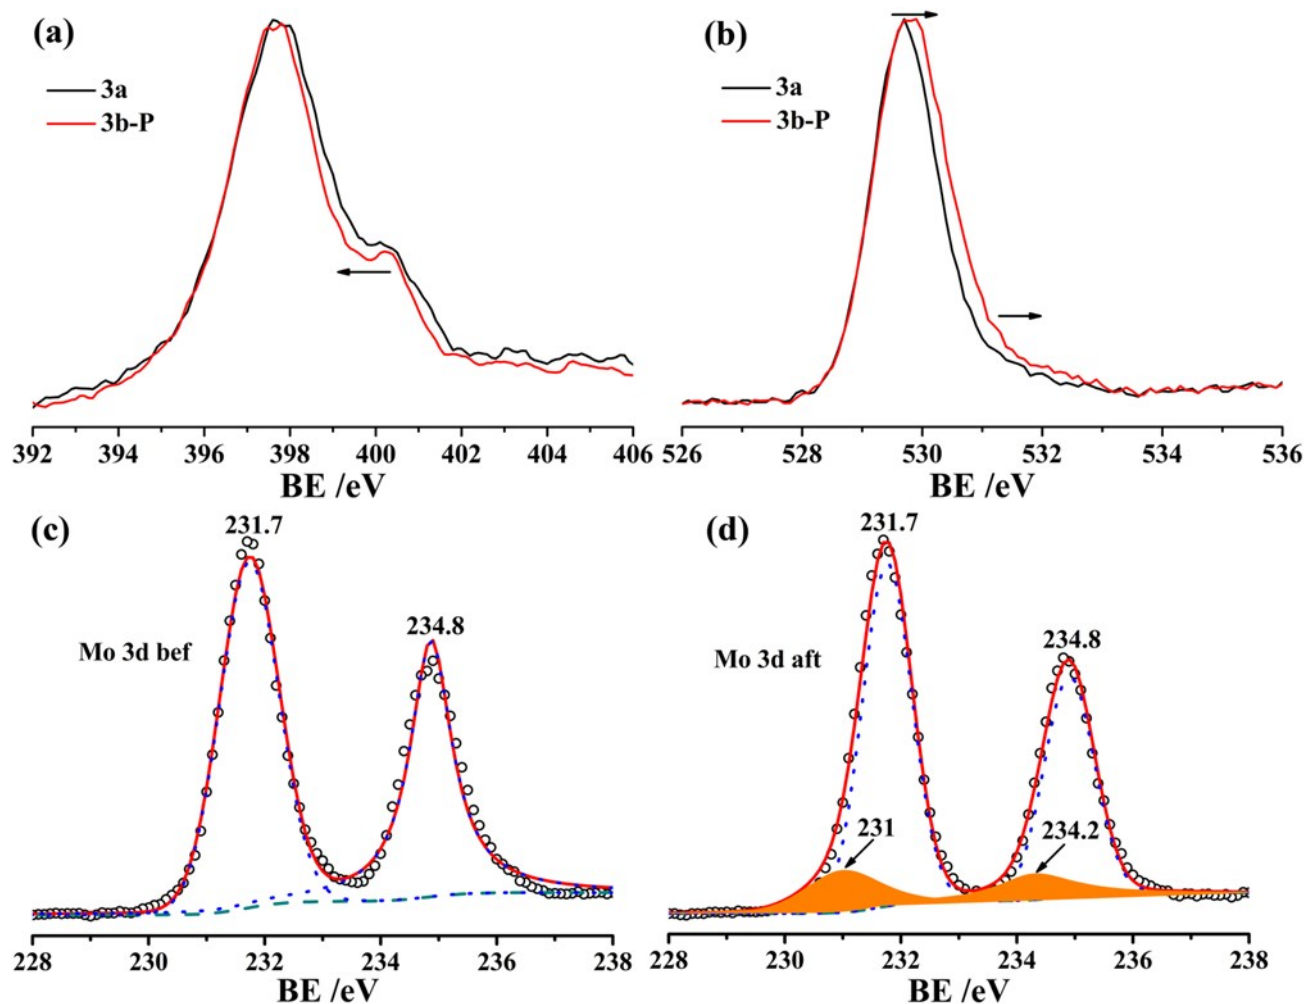

**Fig. S11** The core-level spectra of N 1s XPS ( $Al-K\alpha$ ) (a), O 1s XPS ( $Al-K\alpha$ ) (b), Mo 3d XPS ( $Al-K\alpha$ ) before photo irradiation (c), Mo 3d XPS ( $Al-K\alpha$ ) after photo irradiation (d) for compound **3** in a vacuum. Labels: **3a** before irradiation; **3b-P** after photo irradiation; BE: Binding Energy.

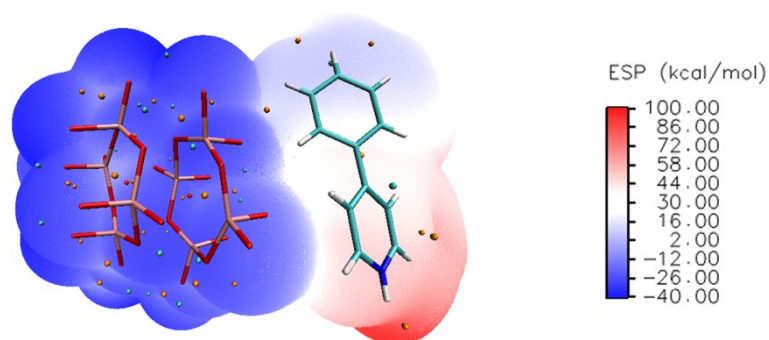

**Fig. S12** Electrostatic potential (ESP) surfaces of the neutral coordination molecule in **3** before irradiation. Significant surface local minima and maxima are represented as orange and cyan spheres, respectively.

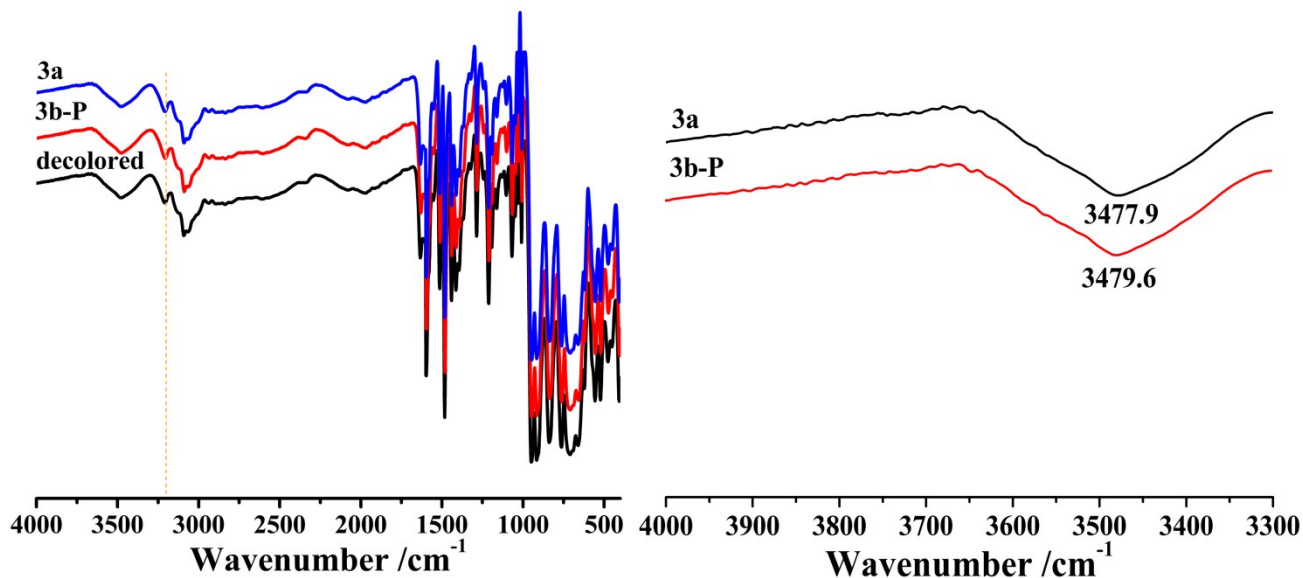

**Fig. S13** FT-IR spectra of **3**. Labels: **3a**, before irradiation; **3b-P**, after photo irradiation; **decolored**, heating in 120 °C for 2 h.

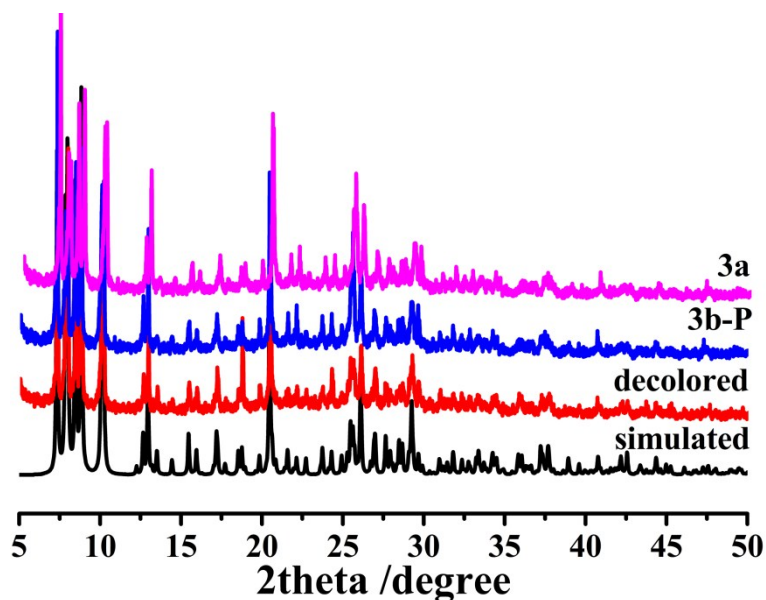

**Fig. S14** PXRD patterns of **3**. Labels: **3a**: before irradiation; **3b-P**: after photo irradiation; **decolored**: heating in 120 °C for 2 h; **simulated**: simulated patterns from single-crystal X-ray structure data.

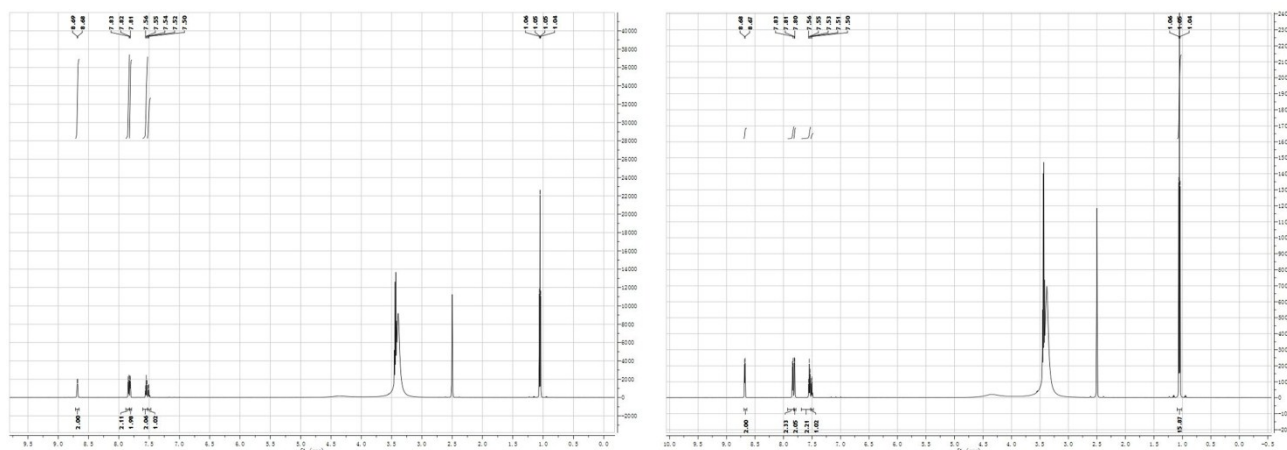

**Fig. S15**  $^1\text{H}$  NMR of compound **3** before and after photo irradiation in DMSO.



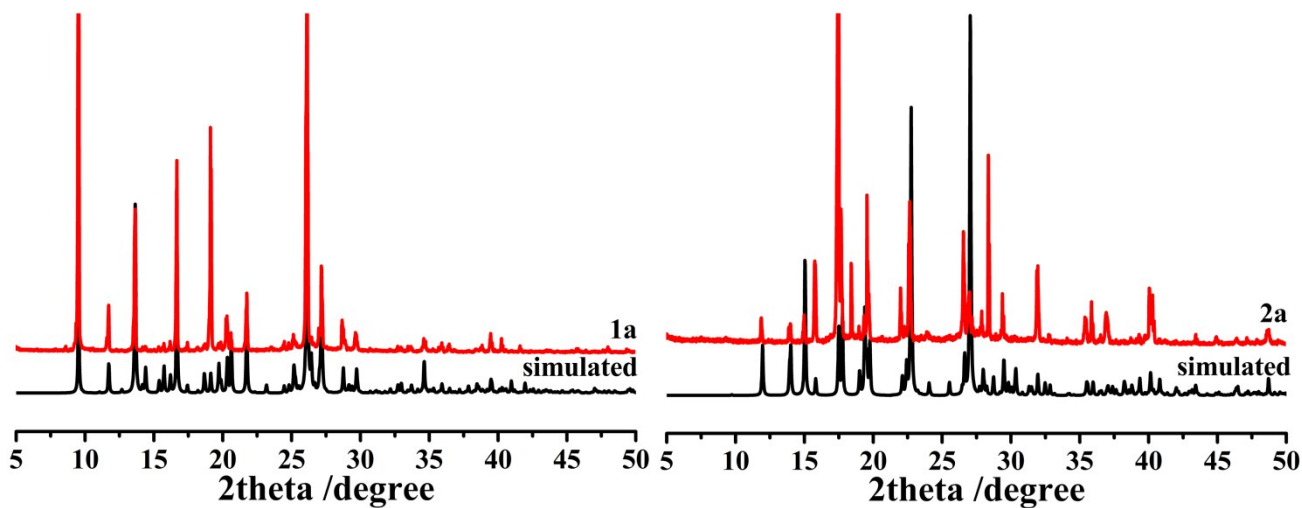

**Fig. S16** PXR D patterns of 1 and 2. Labels: **1a**, **2a**: before irradiation; **simulated**: simulated patterns from single-crystal X-ray structure data.

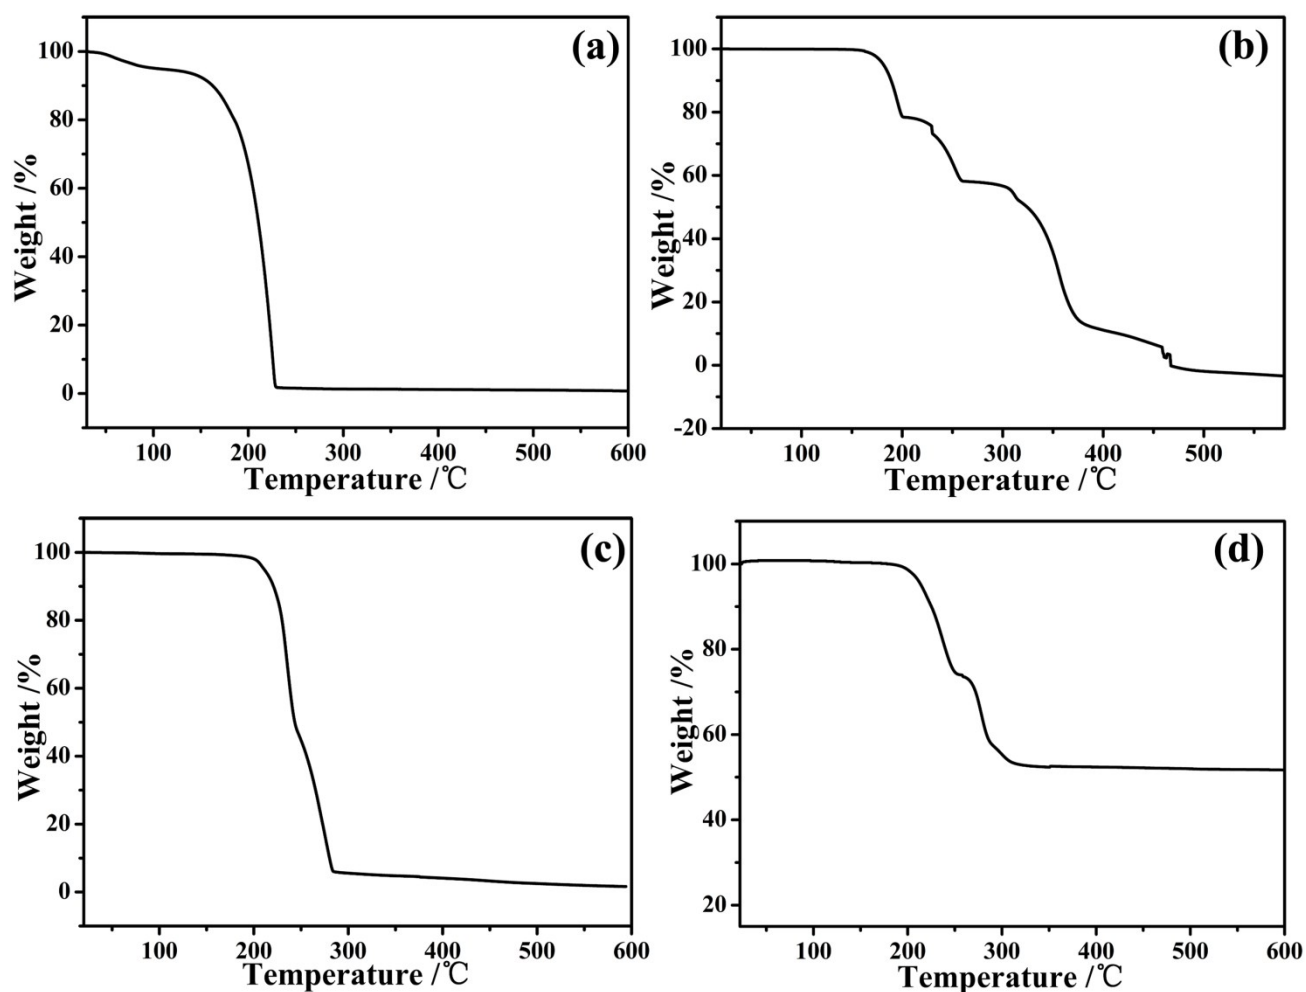

**Fig. S17** TGA curve of aqueous 4-phenylpyridine hydrochloride (**4PPHCl·xH<sub>2</sub>O**) (a), compound 1 (b), 2 (c) and 3 (d) were investigated using powder samples under N<sub>2</sub>.

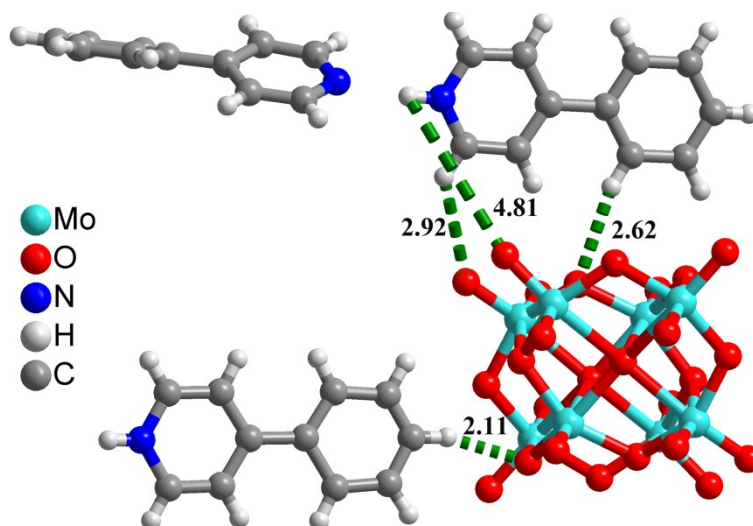

**Fig. S18** Molecular structures of compound **3**. All distances for H bonds are labelled in angstrom.

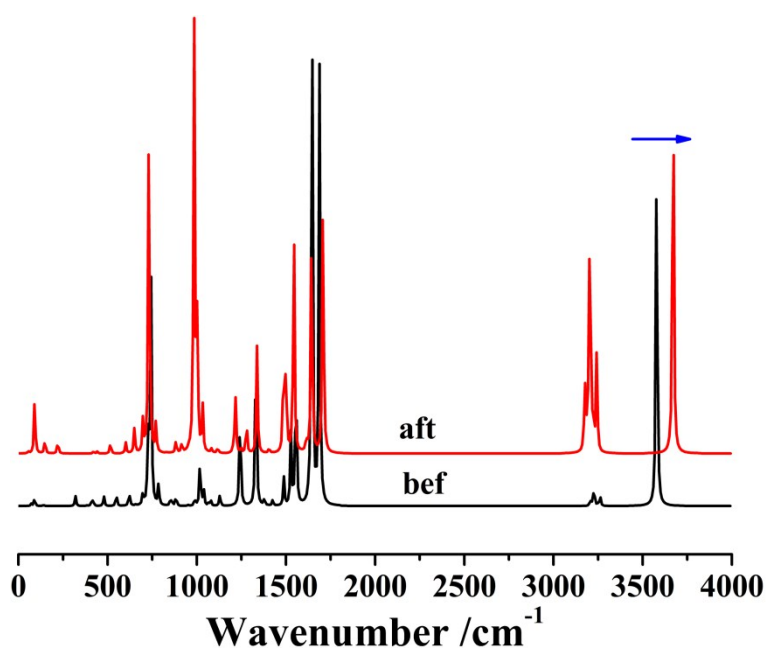

**Fig. S19** The infrared theoretical calculation of protonated 4- phenylpyridine (4PPH) before and after accept one electron using the Gaussian 09 package was carried out at the B3LYP/6-31+G(d,p) level.

### 3. Tables.

**Table S1.** Crystal Data and Structure Refinements for **1**, **2** and **3**.

|                   |                                                               |                                                               |                                                                                             |
|-------------------|---------------------------------------------------------------|---------------------------------------------------------------|---------------------------------------------------------------------------------------------|
| Empirical formula | C <sub>20</sub> H <sub>15</sub> N O <sub>6</sub> ( <b>1</b> ) | C <sub>21</sub> H <sub>15</sub> N O <sub>8</sub> ( <b>2</b> ) | C <sub>66</sub> H <sub>58</sub> Mo <sub>8</sub> N <sub>6</sub> O <sub>26</sub> ( <b>3</b> ) |
| Formula weight    | 365.33                                                        | 409.34                                                        | 2118.70                                                                                     |
| Temperature /K    | 273                                                           | 294                                                           | 293                                                                                         |
| Crystal system    | Monoclinic                                                    | Triclinic                                                     | Triclinic                                                                                   |
| Space group       | <i>P</i> 2 <sub>1</sub> / <i>n</i>                            | <i>P</i> <sub>1</sub>                                         | <i>P</i> -1                                                                                 |

|                                           |                                  |                                  |                                  |
|-------------------------------------------|----------------------------------|----------------------------------|----------------------------------|
| $a / \text{\AA}$                          | 10.5965(14)                      | 6.7875(6)                        | 11.4623(5)                       |
| $b / \text{\AA}$                          | 12.9681(17)                      | 7.4323(7)                        | 13.4719(6)                       |
| $c / \text{\AA}$                          | 13.0204(17)                      | 9.6959(8)                        | 13.5825(6)                       |
| $\alpha / \text{deg}$                     | 90                               | 85.473(5)                        | 114.442(2)                       |
| $\beta / \text{deg}$                      | 106.415(2)                       | 69.797(4)                        | 112.183(2)                       |
| $\gamma / \text{deg}$                     | 90                               | 84.779(5)                        | 90.361(2)                        |
| Volume / $\text{\AA}^3$                   | 1716.3(4)                        | 456.54(7)                        | 1734.92(13)                      |
| $Z$                                       | 4                                | 1                                | 1                                |
| $D_c / \text{g}\cdot\text{cm}^{-3}$       | 1.414                            | 1.489                            | 2.208                            |
| Absorption coefficient / $\text{mm}^{-1}$ | 0.106                            | 0.116                            | 1.485                            |
| Goodness-of-fit on $F^2$                  | 1.073                            | 1.024                            | 1.073                            |
| Final $R$ indices [ $I > 2\sigma(I)$ ]    | $R_1 = 0.0442$ , $wR_2 = 0.1209$ | $R_1 = 0.0435$ , $wR_2 = 0.1050$ | $R_1 = 0.0434$ , $wR_2 = 0.1104$ |
| $R$ indices (all data)                    | $R_1 = 0.0545$ , $wR_2 = 0.1307$ | $R_1 = 0.0604$ , $wR_2 = 0.1162$ | $R_1 = 0.0792$ , $wR_2 = 0.1453$ |

$${}^a R_1 = \frac{\sum ||F_o| - |F_c||}{\sum |F_o|}, {}^b wR_2 = \left\{ \frac{\sum w[(F_o)^2 - (F_c)^2]^2}{\sum w(F_o)_2^2} \right\}^{1/2}.$$

**Table S2.** Selected bond lengths ( $\text{\AA}$ ) for **1**, **2** and **3**.

| <b>1</b>    |            | <b>2</b>   |          | <b>3</b>    |           |
|-------------|------------|------------|----------|-------------|-----------|
| O(1)-C(9)   | 1.2694(19) | O(1)-C(2)  | 1.244(3) | Mo(1)-O(7)  | 1.683(5)  |
| O(4)-C(2)   | 1.3103(18) | O(2)-C(2)  | 1.270(3) | Mo(2)-O(6)  | 1.900(4)  |
| N(1)-C(15)  | 1.326(2)   | O(3)-C(11) | 1.286(3) | Mo(2)-O(3)  | 2.341(4)  |
| C(1)-C(2)   | 1.491(2)   | O(8)-C(11) | 1.195(3) | Mo(3)-O(12) | 1.707(5)  |
| C(4)-C(6)   | 1.384(2)   | O(4)-C(6)  | 1.300(3) | Mo(4)-O(10) | 1.694(5)  |
| O(3)-C(2)   | 1.2104(18) | O(7)-C(6)  | 1.202(4) | N(2)-C(11)  | 1.335(10) |
| O(6)-C(7)   | 1.2205(18) | N(1)-C(19) | 1.316(5) | N(1)-C(6)   | 1.319(10) |
| C(12)-C(16) | 1.387(3)   | C(8)-C(9)  | 1.389(3) | C(1)-C(7)   | 1.398(10) |

**Table S3.** Selected angles (deg) for **1**, **2** and **3**.

| <b>1</b>       |            | <b>2</b>        |          | <b>3</b>         |           |
|----------------|------------|-----------------|----------|------------------|-----------|
| C(7)-O(2)-H(2) | 109.5      | O(8)-C(11)-O(3) | 124.1(2) | O(7)-Mo(1)-O(5)  | 103.7(2)  |
| O(6)-C(7)-O(2) | 124.39(13) | C(11)-O(3)-H(3) | 109.5    | O(9)-Mo(2)-O(6)  | 100.7(2)  |
| C(5)-C(3)-C(7) | 121.14(12) | O(1)-C(2)-O(2)  | 121.6(2) | O(2)-Mo(2)-O(3)  | 73.07(15) |
| O(5)-C(9)-C(4) | 118.88(13) | O(7)-C(6)-C(3)  | 123.2(3) | O(13)-Mo(3)-O(3) | 94.4(2)   |

|                   |            |                   |          |                  |          |
|-------------------|------------|-------------------|----------|------------------|----------|
| C(14)-C(10)-C(12) | 121.20(15) | C(4)-C(9)-C(8)    | 123.1(2) | O(10)-Mo(4)-O(4) | 100.9(2) |
| N(1)-C(15)-H(10)  | 119.6      | C(3)-C(12)-H(12)  | 118.4    | Mo(4)-O(4)-Mo(3) | 115.5(2) |
| C(19)-C(20)-C(17) | 120.5(2)   | N(1)-C(14)-H(14)  | 119.8    | C(8)-C(1)-C(7)   | 116.7(6) |
| O(3)-C(2)-O(4)    | 124.03(14) | C(21)-C(22)-H(22) | 119.3    | N(1)-C(12)-H(9)  | 119.2    |
